# Supplementary material
Source: PubMed Central journal article supplement (PMC2266965)
Supplement: jcem_jc.2007-1525_1.pdf [file jcem_jc.2007-1525_1.pdf]

## Supplementary Material

Three novel missense mutations within the *LHX4* gene are associated with variable pituitary hormone deficiencies. Roland W. Pfaeffle, Chad S. Hunter, Jesse J. Savage, Mario Duran-Prado, Rachel D. Mullen, Zachary P. Neeb, Urs Eiholzer, Volker Hesse, Nadine G. Haddad, Heike M. Stobbe, Werner F. Blum, Johannes F.W. Weigel, and Simon J. Rhodes

### Mutation screening of *LHX4* gene fragments

Oligonucleotide sequences and amplified DNA fragments used for DHPLC-analysis:

(red: oligonucleotide sequence; uppercase: exon sequences)

#### Exon 1

forward primer: 5'-gcg gcc tgc ttg ggg ttt taa t-3'

reverse primer: 5'-tgc cct gtg acc gcc tct gc-3'

fragment length: 316 bp

WAVE fragment T's: 62.7°C/ 69°C

gcggcctgcttgggggttttaattattatTTTgaaatTTTctgaatcgagctagagcgagagagcgagag  
atctccgtagactgcgactcgctggctTTTcgctccgagATGATGCAGAGTGCAGACTGTCCCCGCGGAA  
GGGGCTGTCAAGGGCTCCCGGAGATGCTAGGTGTGCCGATGCAACgtaagacacccccctTTTctcgc  
tgatttaattctaacaagacagctagcagcctcagccgctgcggggcgggcccggacgcccgtcagggg  
ccgggaggggctggcggccggggcgcagaggcgggtcacagggca

#### Exon 2

forward primer 5'-gca ggg ctg tgt gga agg ctc-3'

reverse primer 5'-ctg gcc tac cct gct gca aac-3'

fragment length: 310 bp

WAVE fragment T's: 62.7°C

gcagggctgtgtggaaggctcacagtgcctctctctcctcctcctcacagAGATTCCCCAGTGCCTG  
GCTGCAACCAGCACATCCTGGACAAGTTCATCCTGAAGGTCCCTGGACAGACACTGGCACAGCTCCTGC  
CTCAAGTGTGCAGACTGCCAGATGCAGCTGGCCGACAGGTGCTTCTCCAGGGCTGGGAGCGTCTACTG  
CAAGGAGGACTTCTTCAAgtaagtcagaacggtccgtctcgtggccctggcctgtctctgcctctccc  
caagcagtgagggggaagtttgagcagggtaggccag

#### Exon 3

forward primer: 5'-ttg ctc cct gtg tgc cct aat c-3'

reverse primer: 5'-ggg gca tga gta ggg ctc tga g-3'

fragment length: 366 bp

WAVE fragment T's: 63.6°C

ttgctccctgtgtgccctaactcctttcctgctgcctgacagGCGCTTCGGCACAAAATGCACGGCCT  
GCCAGCAGGGTATCCCCCAACCCAGGTGGTCCGCAAGGCCAGGACTTTGTCTACCACCTGCACTGC  
TTTGCTTGCATCATCTGCAACCGGCAGCTGGCCACGGGGACGAATTCTACCTCATGGAGGACGGGCG  
GCTGGTGTGCAAGGAAGACTACGAGACAGCCAAGCAGAACGgtaagcagcatggccccgcatggtccc  
ctctccaggcctttgTTTgggccaagccctctgcctgaggtgcccttctcatggcgtcccacctgccc  
atccctcagagccctactcatgcacc

#### Exon 4

**forward primer: 5'-gcc tcg cgc tgt cct gcc tac-3'**

**reverse primer: 5'-tga gcc caa cca ccc gtg ag-3'**

**fragment length: 377 bp**

**WAVE fragment T's: 62.6°C**

gcctcgcgctgtcctgcctacagcaggcaggcttaggtgcagaaaggatggaagggaggggtgtgggag  
gaggcgcagctgctgcagataggccgaagccagtaagcagtggtttttccttgcagATGACTCAGAGG  
CTGGAGCTAAGCGGCCCCGGACCACCATCACAGCCAAGCAGCTGGAGACATTAAAGAATGCATACAAG  
AACTCCCCAAGCCTGCCCCGGCACGTGAGGGAGCAGCTGTCCTCAGAGACAGGCCTGGACATGAGGGT  
CGTACAGgtgagatgccagcactcctgtgcccctccgggatcccaggccccgggacaggggtggaaggt  
atcctgagtgacatcagctcacggggtggttgggctca

#### Exon 5

**forward primer: 5'-ggg gga cgc ccc ctg agt atg-3'**

**reverse primer: 5'-ggc ctc aag aaa gat ccc tcc-3'**

**fragment length: 307 bp**

**WAVE fragment T's: 62.6°C**

gggtggaagccccctgagtatgtcccttgtgcttgtgtggcagGTTTGGTTTCAGAACAGAAGGGCCAA  
AGAGAAACGCC'TGAAGAAGGATGCAGGGCGGCACCGCTGGGGGCAGTTCTATAAGAGCGTCAAGAGGA  
GCCGGGGCAGCAGCAAGCAGGAGAAGGAGAGCTCTGCAGAGGACTGTGGGGTTAGTGACAGTGAGCTG  
AGCTTCCGAGgtgagcagggctggaggggcccaggccgaggccttaggaaagtccccctgggaatctgta  
atccccctggcactcaggagggatctttcttgaggcc

#### Exon 6 (fragment 1)

**forward primer: 5'-tgg cag ctg aca ata aat ctc c-3'**

**reverse primer: 5'-gcc caa att act gtc cac cgt-3'**

**fragment length: 277 bp**

**WAVE fragment T's: 62.6°C**

tggcagctgacaataaaatctccgttcttttgtccacagAGGATCAAATTCTCTCAGAACTTGGCCACA  
CCAATAGGATTTATGGCAACGTGGGGACGTTACAGGCGGACAGTTAATGAATGGGAGCTTCTCCATG  
GACGGGACAGGACAATCCTATCAGGACTTGAGGGATGGGAGCCCCTATGGAATCCCCAGTCTCCATC  
CTCCATATCGTCCCTGCCATCCCACGCTCCTTTGCTCAATGGGCTGGATTACACGGTGGACAGTAATT  
TGGGC

#### Exon 6 (fragment 2)

**forward primer: 5'-tgc cat ccc acg ctc ctt tg-3'**

**reverse primer: 5'-gca ggt agg gtg ggg agg aga g-3'**

**fragment length: 240 bp**

**WAVE fragment T's: 62.6°C**

TGCCATCCCACGCTCCTTTGCTCAATGGGCTGGATTACACGGTGGACAGTAATTTGGGCATCATTGCG  
CATGCAGGGCAGGGAGTAAGCCAGACGCTGAGAGCCATGGCTGGGGGACCCACCTCTGACATCTCCAC  
AGGAAGCAGTGTAGGCTATCCCAGCTTTCCAAGTAGCCAGGCTCTTGGCTCGATGAAATGGATCATC  
CTCCTTTTTAAacttctctctccccaccctactgc

**PCR Amplification Conditions:**

PCR reactions were performed on an Eppendorf Mastercycler (Eppendorf, Hamburg, Germany) with 100 ng of genomic DNA and 10 pmol of each forward and reverse oligonucleotide in a volume of 50 µl using 1,25 U of Qiagen Taq-Polymerase (Hilden, Germany), 10 pmol of NTPs and 5 µl of the reaction buffer supplied by the manufacturer.

| PCR program for exons 3 to 6-2 |     |        | for exons 1 and 2 |        |
|--------------------------------|-----|--------|-------------------|--------|
| Initial Denat.                 | 95° | 15 min | 95°               | 15 min |
| 35 cycles                      |     |        |                   |        |
| Denaturation                   | 95° | 1 min  | 95°               | 1 min  |
| Annealing                      | 59° | 1 min  | 59°               | 1 min  |
| Extension                      | 72° | -      | 72°               | 1 min  |
| Final Extension                | 72° | 10 min | 72°               | 10 min |

**DHPLC-Analysis:**

All 7 fragments of the 6 coding exon with flanking intron sequences of the LHX4 gene were screened for mutations by dHPLC (Wave System<sup>®</sup>; Transgenomic Inc., Elancourt, France). For this purpose 10 µl of the patients amplified PCR product was mixed with the corresponding wildtype PCR product and then denatured at 95°C for 5 minutes and cooled via a temperature ramp of 1°C/minute to 37°C. Samples were kept cool until they were automatically inserted into a preheated reversed phase column (DNA-Sep; Transgenomic, San Jose, CA). DNA was eluted on a linear acetonitrile gradient consisting of buffer A (0.1 mol/L triethylammonium acetate; TEAA)/buffer B (0.1 mol/L TEAA, 25% acetonitrile). Gradient elution and melting temperature conditions were determined using Wave-Maker Navigator<sup>®</sup> software version 1.5.4 (Transgenomic). The analysis program calculates the melting temperature of the domains contained in the sequences of interest. Experimental conditions (melting temperature and elution time shift) were optimized by studying alterations in the sample elution profiles. The optimized melting temperatures for each fragment used in our mutation screen are given above.
